# Supplementary figures and images for: Chitosan-Reinforced MFC/NFC Aerogel and Antibacterial Property
Source: Hindawi journal article supplement (doi:10.1155/2020/7890215), 2020-08-26

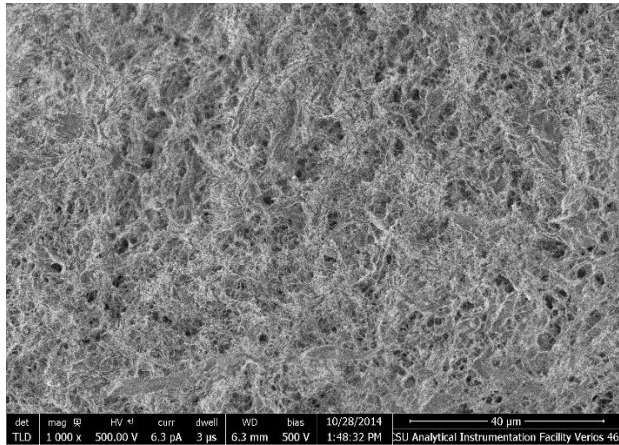

(MFC/CH10 aerogel SEM image above)

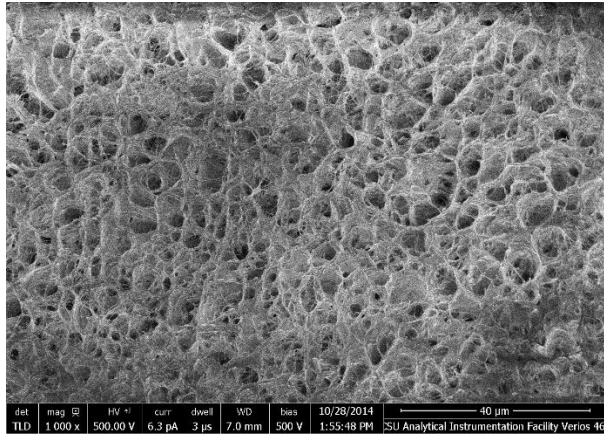

(MFC/CH20 aerogel SEM image above)

Supplement: f1 [file 7890215.f1.pdf]
